# Supplementary material for: Characterization and genomic analyses of two newly isolated Morganella phages define distant members among Tevenvirinae and Autographivirinae subfamilies
Source: PubMed Central journal article supplement (PMC5384007; doi:10.1038/srep46157), 2017-04-07

# **Characterization and genomic analyses of two newly isolated *Morganella* phages define distant members among *Tevenvirinae* and *Autographivirinae* subfamilies**

Hugo Oliveira<sup>1†</sup>, Graça Pinto<sup>1†</sup>, Ana Oliveira<sup>1</sup>, Jean-Paul Noben<sup>2</sup>, Hanne Hendrix<sup>3</sup>, Rob Lavigne<sup>3</sup>, Małgorzata Łobocka<sup>4,5</sup> Andrew M. Kropinski<sup>6</sup> and Joana Azeredo<sup>1\*</sup>

†Equal contribution

**Table S1. *Morganella morganii* phages MP1 and MP2 lytic spectra and efficiency of plating.**

| Species                     | Strain | Origin                                             | Patient gender | Antibiogram                                           | MP1         |      | MP2         |      |
|-----------------------------|--------|----------------------------------------------------|----------------|-------------------------------------------------------|-------------|------|-------------|------|
|                             |        |                                                    |                |                                                       | Infectivity | EOP* | Infectivity | EOP* |
| <i>Morganella morganii</i>  | M1     | CDC 4195-69 (from Salmonella Genetic Stock centre) |                |                                                       | +           | Low  | -           |      |
|                             | M2     | Urine                                              | Female         | AM, AMC, CXM, SXT, TZP, CT, TZ, GM, NN, AN, AmpC      | -           |      | +           | High |
|                             | M3     | Urine                                              | Female         | AM, AMC, CXM, CIP, LVX, FM                            | +           | High | -           |      |
|                             | M4     | Urine                                              | Female         | FM, AM, AMC, CXM, CIP, LVX, SXT                       | +           | High | -           |      |
|                             | M5     | Urine                                              | Male           | AM, AMC, CXM, SXT, TZP, CT, TZ, CIP, GM, NN, AN, AmpC | -           |      | +           | High |
|                             | M6     | Faeces                                             | Female         | Unknown                                               | +           | LFW  | +           | Low  |
|                             | M7     | Urine                                              | Female         | AM, AMC, CXM, SXT, TZP, CT, TZ, CIP, GM, NN, AN, AmpC | +           | High | +           | High |
|                             | M8     | Urine                                              | Female         | AM, AMC, CXM, FM                                      | -           |      | +           | High |
|                             | M9     | Urine                                              | Male           | AM, AMC, CXM, FM                                      | +           | High | -           |      |
|                             | M10    | Faeces                                             | Female         | Unknown                                               | +           | Low  | -           |      |
|                             | M11    | Urine                                              | Female         | AM, AMC, CXM, GM, FM, NN, SXT                         | -           |      | +           | High |
|                             | M12    | Urine                                              | Female         | AM, AMC, CXM, SXT, TZP, CT, TZ, GM, NN, AN, AmpC      | -           |      | +           | High |
|                             | M13    | Urine                                              | Male           | AM, AMC, FM, AmpC                                     | +           | LFW  | +           | High |
|                             | M14    | Cerebrospinal                                      | Male           | AM, AMC, CXM, SXT, TZP, CT, TZ, CIP, GM, NN, AN, AmpC | -           |      | -           |      |
|                             | M15    | Urine                                              | Male           | AM, AMC, CXM, CT, TZ, TZP                             | -           |      | -           |      |
|                             | M16    | Urine                                              | Male           | AM, AMC, CXM                                          | +           | LFW  | +           | High |
|                             | M17    | Urine                                              | Male           | AM, AMC, CXM, FM, SXT, CIP, TZ, CT, AmpC              | +           | LFW  | +           | Low  |
|                             | M18    | Pus                                                | Male           | AM, AMC, CXM, SXT, TZP, CT, TZ, AmpC                  | -           |      | -           |      |
|                             | M19    | Urine                                              | Male           | AM, AMC, CXM, SXT, TZP, AmpC                          | +           | LFW  | -           |      |
|                             | M20    | sputum                                             | Male           | AM, AMC, CXM, SXT, FM, CIP, LVX                       | +           | High | -           |      |
|                             | M21    | Urine                                              | Female         | AM, AMC, CXM, FM                                      | +           | Low  | +           | LFW  |
|                             | M22    | Urine                                              | Male           | AM, AMC                                               | +           | LFW  | -           |      |
|                             | M23    | Urine                                              | Male           | AM, AMC, CXM, CIP, LVX, SXT                           | +           | LFW  | +           | High |
|                             | M24    | Expectoration                                      | Female         | AM, AMC, CXM                                          | +           | LFW  | +           | Low  |
|                             | M25    | Urine                                              | Female         | AM, AMC, FM, CIP                                      | +           | Low  | +           | High |
|                             | M26    | Urine                                              | Female         | AM, AMC, CXM, SXT, TZP, CT, TZ, CIP, GM, NN           | +           | LFW  | -           |      |
|                             | M27    | Urine                                              | Male           | AM, AMC, CIP, LVX, FM                                 | +           | High | +           | High |
| <i>Citrobacter freundii</i> | CF     | EC592 (from Salmonella Genetic Stock centre)       |                |                                                       | -           |      | -           |      |
| <i>Citrobacter koseri</i>   | CK     | Pus                                                | Male           | AM                                                    | -           |      | -           |      |
| <i>Providencia stuartii</i> | PS     | Urine                                              | Female         | AM, AMC, CXM                                          | -           |      | -           |      |
| <i>Proteus mirabilis</i>    | PM     | CECT 4101 (from American Type Culture centre)      |                |                                                       | -           |      | -           |      |
| <i>Proteus vulgaris</i>     | PV     | CECT 174 (from American Type Culture centre)       |                |                                                       | -           |      | -           |      |
| <i>Escherichia coli</i>     | EC     | CECT 432 (from American Type Culture centre)       |                |                                                       | -           |      | -           |      |

<sup>1</sup> Collection strains: M1 - SGSC 5703; CF - SGSC 5345; PM - CECT 4168; PV - CECT 174; EC - CECT 432

<sup>2</sup> Antibiotic resistances: M - ampicillin; AMC - amoxicillin/clavulanic acid; CXM - cefuroxime; SXT - cotrimoxazole; TZP - piperacillin/tazobactam; MEM - meropenem; CT - cefotaxime; TZ - ceftazidime; CIP - ciprofloxacin; GM - gentamicin; NN - tobramycin; AN - amikacin; ESBL - Extended-Spectrum Beta-lactamase producing bacteria; AmpC - beta-lactamases producing bacteria

<sup>3</sup> The EOP was recorded as high and low representing higher and lower than 1 % respectively and marked as LFW for lysis from without events

**Table S2. Features of MP1 predicted CDSs.** For each CDS the transcription start and stop position, and the coding strand is given. At protein level the corresponding gene product size molecular weight and pI as well as the homolog predicted function, homology values and motifs are shown.

| ORF   | Predicted protein |       |      |       |       | Best species hit             | Putative function (accession no.)          | E-value       | Motifs                                           |
|-------|-------------------|-------|------|-------|-------|------------------------------|--------------------------------------------|---------------|--------------------------------------------------|
|       | Start             | Stop  | Size | MW    | pI    |                              |                                            |               |                                                  |
| (+/-) | (bp)              | (bp)  | (aa) | (Kda) |       |                              | (% identify)                               |               |                                                  |
| 1/-   | 15                | 2177  | 720  | 8303  | 816   | Proteus phage vB_PmiM_Pm5461 | rIIA protein                               | 0.0 (45)      | -                                                |
| 2/-   | 2131              | 2370  | 79   | 9.26  | 5.66  | -                            | -                                          | -             | -                                                |
| 3/-   | 2373              | 2561  | 62   | 7.05  | 4.60  | -                            | -                                          | -             | -                                                |
| 4/-   | 2558              | 4375  | 605  | 68.46 | 6.71  | Acinetobacter phage Acj61    | DNA topoisomerase subunit (YP_004009629.1) | 0.0 (67)      | HATPase_c (PF02518.23); DNA_gyraseB (PF00204.22) |
| 5/-   | 4356              | 4700  | 114  | 13.81 | 6.52  | Proteus phage vB_PmiM        | Hypothetical protein (AKA61870.1)          | 600E-16 (41)  | -                                                |
| 6/-   | 4736              | 5137  | 133  | 15.34 | 5.00  | -                            | -                                          | -             | -                                                |
| 7/-   | 5134              | 5514  | 126  | 14.75 | 4.40  | -                            | -                                          | -             | -                                                |
| 8/-   | 5511              | 6197  | 228  | 26.47 | 4.56  | -                            | -                                          | -             | -                                                |
| 9/-   | 6194              | 6817  | 207  | 23.68 | 4.19  | Proteus phage vB_PmiM        | Hypothetical protein (AKA61874.1)          | 100E-37 (40)  | -                                                |
| 10/-  | 6825              | 7013  | 62   | 7.33  | 4.27  | -                            | -                                          | -             | -                                                |
| 11/-  | 7076              | 7777  | 233  | 26.78 | 4.24  | -                            | -                                          | -             | -                                                |
| 12/-  | 7779              | 8468  | 229  | 26.03 | 5.01  | Citrobacter phage Merlin     | Exonuclease A (AKU43661.1)                 | 100E-108 (66) | DUF5051 (PF16473.2)                              |
| 13/-  | 8471              | 9796  | 441  | 50.66 | 6.73  | Proteus phage vB_PmiM        | DNA helicase (AKA61877.1)                  | 0.0 (59)      | AAA_30 (PF13604.3); UvrD_C_2 (PF13538.3)         |
| 14/-  | 9793              | 10074 | 93   | 11.2  | 10.02 | Acinetobacter phage Ac42     | Hypothetical protein (YP_004009387.1)      | 700E-10 (34)  | -                                                |
| 15/-  | 10049             | 10633 | 194  | 23.02 | 10.16 | Proteus phage vB_PmiM        | Anti-sigma factor (AKA61879.1)             | 600E-24 (34)  | -                                                |
| 16/-  | 10637             | 11161 | 174  | 20.19 | 4.78  | Proteus phage vB_PmiM        | dCTP pyrophosphatase (AKA61881.1)          | 500E-91 (72)  | -                                                |
| 17/-  | 11220             | 11768 | 182  | 21.06 | 5.86  | Proteus phage vB_PmiM        | Hypothetical protein (AKA61883.1)          | 100E-07 (39)  | -                                                |
| 18/-  | 11770             | 12591 | 273  | 32.49 | 7.12  | -                            | -                                          | -             | -                                                |
| 19/-  | 12591             | 13034 | 147  | 17.14 | 5.00  | -                            | -                                          | -             | -                                                |
| 20/-  | 13037             | 13447 | 136  | 15.8  | 4.96  | Proteus phage vB_PmiM        | Hypothetical protein (AKA61884.1)          | 100E-46 (56)  | -                                                |
| 21/-  | 13458             | 14246 | 262  | 30.33 | 6.00  | Proteus phage vB_PmiM        | Hypothetical protein (AKA61885.1)          | 500E-132 (69) | -                                                |
| 22/-  | 14308             | 14619 | 103  | 12.15 | 4.65  | -                            | -                                          | -             | -                                                |
| 23/-  | 14710             | 14877 | 55   | 6.53  | 3.82  | -                            | -                                          | -             | -                                                |

|      |       |       |     |        |       |                           |                                                                    |                  |                                                    |
|------|-------|-------|-----|--------|-------|---------------------------|--------------------------------------------------------------------|------------------|----------------------------------------------------|
| 24/- | 14867 | 15532 | 221 | 25.62  | 4.69  | -                         | -                                                                  | -                | -                                                  |
| 25/- | 15536 | 15937 | 133 | 15.62  | 5.25  | -                         | -                                                                  | -                | -                                                  |
| 26/- | 15941 | 16966 | 341 | 40.02  | 8.99  | Proteus phage vB_PmiM     | DNA primase subunit (AKA61888.1)                                   | 200E-153<br>(63) | -                                                  |
| 27/- | 17098 | 17544 | 148 | 16.43  | 9.99  | Shigella phage Shf125875  | Hypothetical protein (YP_009100573.1)                              | 400E-60<br>(65)  | Gp23 (PF07068.8)                                   |
| 28/- | 17541 | 18935 | 464 | 52.28  | 5.01  | Proteus phage vB_PmiM     | DNA helicase (AKA61890.1)                                          | 0.0 (73)         | DnaB_C (PF03796.12)                                |
| 29/- | 18929 | 19267 | 112 | 13.04  | 4.10  | Proteus phage vB_PmiM     | Head vertex assembly chaperone (AKA61891.1)                        | 200E-27<br>(52)  | Phage_head_chap (PF11113.5)                        |
| 30/- | 19301 | 20446 | 381 | 42.85  | 5.54  | Serratia phage PS2        | RecA-like recombination (YP_009030086.1)                           | 0.0 (81)         | RecA (PF00154.18)                                  |
| 31/- | 20500 | 21030 | 176 | 20.83  | 4.86  | Yersinia phage phiR1-RT   | Hypothetical protein (YP_007235878.1)                              | 200E-52<br>(54)  | -                                                  |
| 32/- | 21027 | 21239 | 70  | 7.98   | 10.06 | -                         | -                                                                  | -                | 1 TMD                                              |
| 33/- | 21236 | 21667 | 143 | 16.72  | 9.64  | Proteus phage vB_PmiM     | Hypothetical protein (AKA61905.1)                                  | 200E-15<br>(37)  | 1 SP                                               |
| 34/- | 21719 | 24436 | 905 | 104.57 | 6.14  | Proteus phage vB_PmiM     | DNA polymerase (AKA61906.1)                                        | 0.0 (73)         | DNA_pol_B_exo1(PF03104.16); DNA_pol_B (PF00136.18) |
| 35/- | 24492 | 24851 | 119 | 14.01  | 8.71  | Proteus phage vB_PmiM     | Translational repressor (AKA61908.1)                               | 700E-60<br>(76)  | Translat_reg (PF01818.14)                          |
| 36/- | 24876 | 25040 | 54  | 6.13   | 9.58  | -                         | -                                                                  | -                | -                                                  |
| 37/- | 25043 | 25624 | 193 | 23.07  | 5.38  | Proteus phage vB_PmiM     | DNA polymerase accessory protein clamp loader subunit (AKA61909.1) | 300E-69<br>(56)  | Phage_clamp_A (PF16790.2)                          |
| 38/- | 25617 | 26585 | 322 | 36.47  | 7.27  | Proteus phage vB_PmiM     | DNA polymerase accessory protein clamp loader subunit (AKA61910.1) | 100E-155<br>(66) | AAA (PF00004.26)                                   |
| 39/- | 26595 | 27281 | 228 | 25.38  | 4.52  | Proteus phage vB_PmiM     | Sliding clamp (AKA61911.1)                                         | 400E-78<br>(55)  | DNA_PPF (PF02916.12); gp45-slide_C (PF09116.7)     |
| 40/- | 27286 | 27606 | 106 | 12.51  | 5.77  | Enterobacteria phage RB49 | RNA polymerase biding (NP_891603.1)                                | 400E-12<br>(43)  | Phage_RpbA (PF10789.6)                             |
| 41/- | 27599 | 27787 | 62  | 7.4    | 4.15  | Serratia phage PS2        | Hypothetical protein (YP_009030106.1)                              | 200E-10<br>(50)  | -                                                  |
| 42/- | 27774 | 28028 | 84  | 9.58   | 4.79  | Morganella morganii       | Hypothetical protein (WP_046394122.1)                              | 200E-22<br>(53)  | -                                                  |
| 43/- | 28018 | 29709 | 563 | 64.1   | 7.94  | Proteus phage vB_PmiM     | Recombination endonuclease subunit (AKA61914.1)                    | 0.0 (60)         | AAA_23 (PF13476.3)                                 |
| 44/- | 29706 | 30707 | 333 | 38.59  | 5.16  | Proteus phage vB_PmiM     | Recombination endonuclease subunit (AKA61915.1)                    | 800E-169<br>(66) | -                                                  |
| 45/- | 30725 | 31033 | 102 | 11.9   | 4.45  | -                         | -                                                                  | -                | -                                                  |
| 46/- | 31042 | 31353 | 103 | 11.97  | 8.21  | -                         | -                                                                  | -                | -                                                  |
| 47/- | 31350 | 31568 | 72  | 8.71   | 9.71  | -                         | -                                                                  | -                | -                                                  |
| 48/- | 31568 | 31723 | 51  | 6.08   | 6.60  | -                         | -                                                                  | -                | -                                                  |
| 49/- | 31728 | 32066 | 112 | 13.19  | 5.28  | Proteus phage vB_PmiM     | Hypothetical protein (AKA61917.1)                                  | 700E-17<br>(44)  | DUF2654 (PF10849.5)                                |
| 50/- | 32044 | 32250 | 68  | 8.12   | 4.57  | -                         | -                                                                  | -                | -                                                  |
| 51/- | 32243 | 32761 | 172 | 20.5   | 4.53  | Proteus phage vB_PmiM     | Sigma factor for late transcription (AKA61918.1)                   | 700E-82<br>(70)  | -                                                  |
| 52/- | 32929 | 34356 | 475 | 54.81  | 8.80  | Proteus phage vB_PmiM     | Hypothetical protein (AKA61919.1)                                  | 0.0 (69)         | -                                                  |

|       |       |       |     |        |       |                              |                                                          |                 |                                                          |
|-------|-------|-------|-----|--------|-------|------------------------------|----------------------------------------------------------|-----------------|----------------------------------------------------------|
| 53/-  | 34366 | 34659 | 97  | 11.32  | 6.89  | Enterobacteria phage Bp7     | Hypothetical protein (YP_007004107.1)                    | 700E-20<br>(46) | -                                                        |
| 54/-  | 34652 | 34927 | 91  | 10.59  | 5.14  | Proteus phage vB_PmiM        | Glutaredoxin (AKA61921.1)                                | 200E-37<br>(69) | -                                                        |
| 55/-  | 34924 | 35196 | 90  | 10.15  | 3.72  | -                            | -                                                        | -               | -                                                        |
| 56/-  | 35196 | 35447 | 83  | 9.71   | 3.90  | -                            | -                                                        | -               | -                                                        |
| 57/-  | 35444 | 35695 | 83  | 10.06  | 4.52  | -                            | -                                                        | -               | -                                                        |
| 58/-  | 35692 | 36177 | 161 | 18.74  | 7.45  | Enterobacteria phage T4      | NrdG anaerobic NTP reductase small subunit (NP_049688.1) | 300E-56<br>(56) | Fer4_12 (PF13353.3)                                      |
| 59/-  | 36216 | 36611 | 131 | 14.75  | 4.64  | Aeromonas phage Aeh1         | Hypothetical protein (NP_944196.1)                       | 300E-11<br>(55) | -                                                        |
| 60/-  | 36608 | 39385 | 925 | 104.83 | 7.03  | Vibrio phage PVo5            | Anaerobic NTP reductase large subunit (AKY02222.1)       | 0.0 (49)        | NRDD (PF13597.3)                                         |
| 61/-  | 39382 | 39852 | 156 | 18.24  | 8.45  | Proteus phage vB_PmiM        | Recombinase endonuclease VII (AKA61926.1)                | 100E-79<br>(74) | Endonuclease_7 (PF02945.12); Endonuc-dimeris (PF09124.7) |
| 62/-  | 39891 | 40079 | 62  | 7.2    | 4.09  | -                            | -                                                        | -               | -                                                        |
| 63/-  | 40070 | 40336 | 88  | 9.98   | 6.23  | Proteus phage vB_PmiM        | Thioredoxin (AKA61928.1)                                 | 700E-29<br>(56) | Glutaredoxin (PF00462.21)                                |
| 64/-  | 40333 | 40632 | 99  | 11.23  | 5.04  | -                            | -                                                        | -               | -                                                        |
| 65/-  | 40629 | 40874 | 81  | 9.31   | 4.22  | -                            | -                                                        | -               | -                                                        |
| 66/-  | 41089 | 41316 | 75  | 8.93   | 9.50  | -                            | -                                                        | -               | 2 TMD; 1 SP                                              |
| 67/-  | 41313 | 41540 | 75  | 9.03   | 8.49  | Enterobacteria phage T4      | Hypothetical protein (NP_049700.1)                       | 300E-18<br>(64) | -                                                        |
| 68/-  | 41542 | 42126 | 194 | 22.72  | 7.63  | Xenorhabdus griffinae        | Hypothetical protein (WP_047771056.1)                    | 400E-17<br>(36) | -                                                        |
| 69/-  | 42128 | 43144 | 338 | 39.37  | 6.68  | Salmonella phage STML-198    | Thioredoxin (YP_009148083.1)                             | 0.0 (80)        | Nuc-transf (PF10127.6)                                   |
| 70/-  | 43141 | 43485 | 114 | 13.5   | 5.72  | -                            | -                                                        | -               | 1 SP                                                     |
| 71/-  | 43482 | 43931 | 149 | 17.15  | 8.77  | Proteus phage vB_PmiM        | Hypothetical protein (AKA61934.1)                        | 200E-24<br>(39) | -                                                        |
| 72/-  | 43921 | 44142 | 73  | 8.59   | 4.48  | Proteus phage vB_PmiM_Pm5461 | Hypothetical protein (AKA61935.1)                        | 500E-17<br>(55) | -                                                        |
| 73/-  | 44135 | 44650 | 171 | 19.2   | 7.81  | -                            | -                                                        | -               | -                                                        |
| 74/-  | 44652 | 44867 | 71  | 8.2    | 3.68  | -                            | -                                                        | -               | -                                                        |
| 75/-  | 44854 | 44979 | 41  | 4.93   | 10.97 | Enterobacteria phage vB_EcoM | Hypothetical protein (YP_004063951.1)                    | 300E-09<br>(85) | -                                                        |
| 76/-  | 44981 | 45718 | 245 | 27.89  | 9.35  | Proteus phage vB_PmiM        | Hypothetical protein (AKA61938.1)                        | 100E-17<br>(28) | 3 TMD                                                    |
| 77/-  | 45729 | 45953 | 74  | 8.85   | 4.24  | -                            | -                                                        | -               | -                                                        |
| 78/-  | 45955 | 46104 | 49  | 5.55   | 8.55  | -                            | -                                                        | -               | -                                                        |
| 79/-  | 46094 | 46414 | 106 | 12.49  | 5.51  | -                            | -                                                        | -               | -                                                        |
| 80/-  | 46414 | 46656 | 80  | 9.11   | 4.24  | -                            | -                                                        | -               | 1 SP                                                     |
| 80A/- | 46653 | 46847 | 64  | 744    | 952   | Citrobacter phage Merlin     | Immunity to superinfection protein                       | 400E-9<br>(50)  | 2 TMD; Imm_superinfect (PF14373.3)                       |
| 81/-  | 46856 | 47089 | 77  | 8.68   | 4.96  | -                            | -                                                        | -               | -                                                        |

|       |       |       |     |       |       |                                  |                                             |                 |                                             |
|-------|-------|-------|-----|-------|-------|----------------------------------|---------------------------------------------|-----------------|---------------------------------------------|
| 82/-  | 47086 | 47589 | 167 | 19.62 | 4.32  | -                                | -                                           | -               | -                                           |
| 83/-  | 47597 | 47758 | 53  | 6.23  | 9.97  | Proteus phage vB_PmiM            | Hypothetical protein (AKA61947.1)           | 200E-12<br>(61) | -                                           |
| 84/-  | 47755 | 48033 | 92  | 10.44 | 9.77  | -                                | -                                           | -               | -                                           |
| 85/-  | 48135 | 48410 | 91  | 10.53 | 4.81  | Proteus phage vB_PmiM            | Hypothetical protein (AKA61950.1)           | 500E-19<br>(47) | -                                           |
| 86/-  | 48487 | 48762 | 91  | 10.23 | 4.33  | Enterobacteria phage CC31        | Lysis inhibition (YP_004009968.1)           | 300E-18<br>(44) | 1 SP                                        |
| 87/-  | 48775 | 48978 | 67  | 7.97  | 10.16 | Edwardsiella phage PEi20         | Hypothetical protein (BAQ22762.1)           | 200E-04<br>(37) | -                                           |
| 88/-  | 49001 | 49579 | 192 | 21.79 | 6.35  | Pectobacterium bacteriophage PM2 | Thymidine kinase (AHY25080.1)               | 100E-89<br>(65) | TK (PF00265.15)                             |
| 89/-  | 49581 | 49760 | 59  | 6.98  | 10.31 | -                                | -                                           | -               | -                                           |
| 90/-  | 49784 | 50047 | 87  | 10.11 | 6.48  | Enterobacteriaceae               | Hypothetical protein (WP_008786603.1)       | 300E-10<br>(38) | -                                           |
| 91/-  | 50044 | 50313 | 89  | 10.78 | 9.04  | Escherichia phage vB_EcoS        | Hypothetical protein (YP_009031684.1)       | 100E-07<br>(39) | -                                           |
| 92/-  | 50304 | 50525 | 73  | 8.88  | 9.60  | -                                | -                                           | -               | 2 TMD                                       |
| 93/-  | 50522 | 50968 | 148 | 17.11 | 8.85  | Proteus phage vB_PmiM            | Hypothetical protein (AKA61957.1)           | 400E-63<br>(63) | 1 SP                                        |
| 94/-  | 50965 | 51213 | 82  | 9.12  | 4.07  | Proteus phage vB_PmiM            | tRNA synthetase modifier (AKA61958.1)       | 300E-26<br>(56) | -                                           |
| 95/-  | 51267 | 51821 | 184 | 21.66 | 8.68  | Proteus phage vB_PmiM            | Hypothetical protein (AKA61959.1)           | 700E-62<br>(58) | 1 SP                                        |
| 96/-  | 51818 | 52255 | 145 | 17.44 | 9.51  | Proteus phage vB_PmiM            | site-specific RNA endonuclease (AKA61960.1) | 300E-34<br>(46) | REGB_T4 (PF10715.6)                         |
| 97/-  | 52257 | 52652 | 131 | 15.38 | 10.08 | Proteus phage vB_PmiM            | Endonuclease V (AKA61961.1)                 | 400E-69<br>(78) | Pyr_excise (PF03013.11)                     |
| 98/-  | 52707 | 53108 | 133 | 14.99 | 6.00  | Klebsiella phage JD18            | Hypothetical protein (AKY01977.1)           | 400E-39<br>(58) | Gly_radical (PF01228.18)                    |
| 99/-  | 53246 | 53626 | 126 | 15.1  | 7.66  | Proteus phage vB_PmiM            | Hypothetical protein (AKA61964.1)           | 700E-07<br>(33) | -                                           |
| 100/- | 53680 | 54111 | 143 | 16.48 | 5.73  | Proteus phage vB_PmiM            | Hypothetical protein (AKA61965.1)           | 500E-42<br>(60) | -                                           |
| 101/- | 54142 | 54525 | 127 | 14.48 | 9.33  | Escherichia coli                 | peptidase M15 (WP_000002675.1)              | 300E-54<br>(71) | VanY (PF02557); Peptidase_M15_4 (PF13539.3) |
| 102/- | 54559 | 54966 | 135 | 15.99 | 4.58  | Proteus phage vB_PmiM            | Hypothetical protein (AKA61967.1)           | 300E-07<br>(38) | -                                           |
| 103/- | 54968 | 55240 | 90  | 10.16 | 7.25  | -                                | -                                           | -               | -                                           |
| 104/- | 55230 | 55643 | 137 | 15.67 | 5.23  | Proteus phage vB_PmiM            | Nudix hydrolase (AKA61968.1)                | 600E-44<br>(57) | 4 TMD; NUDIX (PF00293.25)                   |
| 105/- | 55873 | 56097 | 74  | 8.75  | 3.98  | -                                | -                                           | -               | -                                           |
| 106/- | 56099 | 56629 | 176 | 20.3  | 8.57  | -                                | -                                           | -               | -                                           |
| 107/- | 56619 | 57122 | 167 | 20.21 | 6.29  | -                                | -                                           | -               | -                                           |
| 108/- | 57119 | 57595 | 158 | 18.65 | 8.40  | -                                | -                                           | -               | -                                           |
| 109/- | 57592 | 58026 | 144 | 16.73 | 9.11  | -                                | -                                           | -               | 3 TMD                                       |
| 110/- | 58023 | 58355 | 110 | 12.84 | 9.53  | -                                | -                                           | -               | 2 TMD                                       |

|       |       |       |     |       |       |                                       |                                       |                  |                      |
|-------|-------|-------|-----|-------|-------|---------------------------------------|---------------------------------------|------------------|----------------------|
| 111/- | 58352 | 58624 | 90  | 10.73 | 10.48 | -                                     | -                                     | -                | 1 TMD; 1 SP          |
| 112/- | 58624 | 58947 | 107 | 12.27 | 9.75  | -                                     | -                                     | -                | 2 TMD; 1 SP          |
| 113/- | 58989 | 59585 | 198 | 22.31 | 5.82  | Proteus phage vB_PmiM                 | Hypothetical protein (AKA61971.1)     | 200E-42<br>(43)  | -                    |
| 114/- | 59597 | 59794 | 65  | 7.15  | 9.88  | Enterobacter phage EcP1               | Hypothetical protein (YP_007003127.1) | 100E-06<br>(35)  | 1 TMD                |
| 115/- | 59864 | 60136 | 90  | 10.56 | 4.51  | Proteus phage vB_PmiM                 | Hypothetical protein (AKA61973.1)     | 300E-49<br>(83)  | -                    |
| 116/- | 60221 | 60463 | 80  | 8.95  | 8.50  | Proteus phage vB_PmiM                 | Hypothetical protein (AKA61976.1)     | 200E-44<br>(84)  | -                    |
| 117/- | 60505 | 60945 | 146 | 16.16 | 5.23  | Enterobacteria phage vB_EcoM-VR7      | Hypothetical protein (YP_004063828.1) | 900E-26<br>(45)  | -                    |
| 118/- | 61046 | 61315 | 89  | 10    | 4.62  | Proteus phage vB_PmiM                 | Hypothetical protein (AKA61973.1)     | 200E-37<br>(69)  | -                    |
| 119/- | 61398 | 61829 | 143 | 16.26 | 10.45 | Shigella phage SP18                   | Hypothetical protein (YP_003934772.1) | 500E-40<br>(52)  | -                    |
| 120/- | 61947 | 62297 | 116 | 13.48 | 4.85  | Proteus phage vB_PmiM                 | Hypothetical protein (AKA61978.1)     | 100E-38<br>(57)  | -                    |
| 121/- | 62298 | 62489 | 63  | 7.36  | 4.17  | -                                     | -                                     | -                | -                    |
| 122/- | 62499 | 62828 | 109 | 12.64 | 5.66  | Thermaerobacter marianensis DSM 12885 | Spore coat assembly (ADU50651.1)      | 800E-07<br>(58)  | LysM (PF01476.17)    |
| 123/- | 63002 | 63340 | 112 | 12.99 | 4.07  | Proteus phage vB_PmiM                 | Hypothetical protein (AKA61981.1)     | 100E-31<br>(55)  | -                    |
| 124/- | 63350 | 63649 | 99  | 11.65 | 4.04  | -                                     | -                                     | -                | -                    |
| 125/- | 63668 | 63847 | 59  | 6.93  | 10.33 | -                                     | -                                     | -                | -                    |
| 126/- | 64171 | 64419 | 82  | 9.94  | 9.86  | -                                     | -                                     | -                | 1 TMD                |
| 127/- | 64534 | 65061 | 175 | 20.97 | 9.62  | Edwardsiella phage PEi20              | Hypothetical protein (BAQ22801.1)     | 700E-104<br>(84) | T5orf172 (PF10544.6) |
| 128/- | 65314 | 65478 | 54  | 6.45  | 10.69 | -                                     | -                                     | -                | -                    |
| 129/- | 65667 | 65975 | 102 | 11.75 | 4.15  | -                                     | -                                     | -                | -                    |
| 130/- | 65993 | 66379 | 128 | 14.14 | 7.44  | Proteus phage vB_PmiM                 | Hypothetical protein (AKA61987.1)     | 100E-63<br>(70)  | 1 SP                 |
| 131/- | 66578 | 66742 | 54  | 6.59  | 10.24 | -                                     | -                                     | -                | -                    |
| 132/- | 66835 | 66948 | 37  | 4.11  | 10.13 | -                                     | -                                     | -                | -                    |
| 133/- | 67012 | 67452 | 146 | 17.07 | 4.44  | Klebsiella phage JD18                 | Hypothetical protein (AKY01997.1)     | 400E-23<br>(38)  | -                    |
| 134/- | 67449 | 67709 | 86  | 10.22 | 8.47  | -                                     | -                                     | -                | -                    |
| 135/- | 67718 | 67987 | 89  | 10.03 | 9.73  | -                                     | -                                     | -                | -                    |
| 136/- | 68008 | 68298 | 96  | 11.21 | 8.96  | Salmonella phage STP4-a               | Hypothetical protein (YP_009126336.1) | 200E-17<br>(47)  | -                    |
| 137/- | 68355 | 68804 | 149 | 16.88 | 6.51  | Enterobacteria phage T4               | Hypothetical protein (NP_049750.1)    | 100E-79<br>(77)  | -                    |
| 138/- | 68797 | 69069 | 90  | 10.24 | 3.88  | -                                     | -                                     | -                | -                    |
| 139/- | 69020 | 69706 | 228 | 26.64 | 6.52  | Proteus phage vB_PmiM                 | dNMP kinase (AKA61994.1)              | 100E-56<br>(47)  | -                    |

|       |       |       |      |        |       |                            |                                                        |               |                                                |
|-------|-------|-------|------|--------|-------|----------------------------|--------------------------------------------------------|---------------|------------------------------------------------|
| 140/- | 69709 | 70296 | 195  | 21.84  | 4.82  | Enterobacteria phage CC31  | Tail completion and sheath stabilizer (YP_004010008.1) | 500E-80 (58)  | Phage_T4_gp19 (PF06841.9)                      |
| 141/- | 70513 | 71319 | 268  | 30.95  | 10.61 | Proteus phage vB_PmiM      | DNA end protector (AKA61996.1)                         | 400E-139 (73) | -                                              |
| 142/+ | 71321 | 71770 | 149  | 17.84  | 10.32 | Serratia phage PS2         | Head completion (YP_009030206.1)                       | 500E-77 (73)  | -                                              |
| 143/+ | 71829 | 72380 | 183  | 21.61  | 6.11  | Proteus phage vB_PmiM      | Baseplate wedge subunit (AKA61998.1)                   | 800E-101 (76) | Phage_gp53 (PF11246.5)                         |
| 144/+ | 72377 | 74113 | 578  | 63.45  | 4.74  | Proteus phage vB_PmiM      | Baseplate hub subunit and tail lysozyme (AKA61999.1)   | 0.0 (55)      | Phage_lysozyme (pfam00959); Gp5_OB (PF06714.8) |
| 145/+ | 74158 | 74592 | 144  | 16.42  | 4.49  | E. coli phage vB_EcoM_JS09 | Hypothetical protein (YP_009037343.1)                  | 200E-38 (44)  | -                                              |
| 146/+ | 74592 | 74885 | 97   | 10.26  | 8.51  | Klebsiella phage JD18      | Hypothetical protein (AKY02017.1)                      | 200E-44 (74)  | PAAR_motif (PF05488.10)                        |
| 147/+ | 74882 | 76789 | 635  | 72.37  | 4.57  | Proteus phage vB_PmiM      | Baseplate wedge subunit (AKA62001.1)                   | 0.0 (72)      | -                                              |
| 148/+ | 76789 | 79932 | 1047 | 121.22 | 5.31  | Proteus phage vB_PmiM      | Baseplate wedge subunit (AKA62002.1)                   | 0.0 (69)      | -                                              |
| 149/+ | 79929 | 80930 | 333  | 38.63  | 4.68  | Proteus phage vB_PmiM      | Baseplate wedge tail fiber connector (AKA62003.1)      | 0.0 (77)      | Phage-Gp8 (PF09215.7)                          |
| 150/+ | 80988 | 81842 | 284  | 31.34  | 6.17  | Proteus phage vB_PmiM      | Baseplate wedge subunit and tail pin (AKA62004.1)      | 500E-135 (67) | T4_gp9_10 (PF09215.7)                          |
| 151/+ | 81839 | 83644 | 601  | 67.11  | 4.27  | Citrobacter phage Moon     | Baseplate wedge subunit and tail pin (YP_009146609.1)  | 0.0 (48)      | T4_gp9_10 (PF09215.7)                          |
| 152/+ | 83644 | 84279 | 211  | 23.26  | 4.31  | Proteus phage vB_PmiM      | Baseplate wedge subunit and tail pin (AKA62007.1)      | 300E-45 (45)  | GP11 (PF08677.7)                               |
| 153/+ | 84279 | 85595 | 438  | 47.61  | 8.02  | Proteus phage vB_PmiM      | Short tail fibers (AKA62008.1)                         | 300E-133 (49) | -                                              |
| 154/+ | 85607 | 86962 | 451  | 49.51  | 4.48  | Proteus phage vB_PmiM      | Fibritin neck whiskers (AKA62009.1)                    | 900E-125 (47) | Fibritin_C (PF07921.9)                         |
| 155/+ | 86923 | 87348 | 141  | 15.78  | 4.45  | Proteus phage vB_PmiM      | Fibritin neck whiskers (AKA62009.1)                    | 400E-05 (28)  | -                                              |
| 156/+ | 87382 | 88308 | 308  | 34.19  | 4.41  | Proteus phage vB_PmiM      | Neck (AKA62010.1)                                      | 400E-172 (75) | -                                              |
| 157/+ | 88313 | 89053 | 246  | 28.86  | 4.18  | Proteus phage vB_PmiM      | Neck (AKA62011.1)                                      | 200E-126 (72) | T4_neck-protein (PF11649.5)                    |
| 158/+ | 89063 | 89884 | 273  | 32.38  | 4.87  | Proteus phage vB_PmiM      | Tail sheath stabilization (AKA62012.1)                 | 800E-134 (68) | T4_gp15_tss (PF16724.2)                        |
| 159/+ | 89887 | 90357 | 156  | 17.61  | 4.48  | Proteus phage vB_PmiM      | Terminase small subunit (AKA62013.1)                   | 800E-77 (76)  | DNA_Packaging (PF11053.5)                      |
| 160/+ | 90338 | 92137 | 599  | 68.78  | 4.81  | Proteus phage vB_PmiM      | Terminase large subunit (AKA62014.1)                   | 0.0 (84)      | Terminase_6 (PF03237.12)                       |
| 161/+ | 92160 | 94148 | 662  | 72.62  | 5.44  | Proteus phage vB_PmiM      | Tail sheath (AKA62015.1)                               | 0.0 (76)      | Phage_sheath_1 (PF04984.11)                    |
| 162/+ | 94187 | 94678 | 163  | 18.57  | 4.82  | Proteus phage vB_PmiM      | Tail tube (AKA62016.1)                                 | 300E-97 (79)  | Phage_T4_gp19 (PF06841.9)                      |
| 163/+ | 94728 | 96287 | 519  | 60.3   | 5.27  | Proteus phage vB_PmiM      | Portal vertex of head (AKA62017.1)                     | 0.0 (68)      | Peptidase_S80 (PF07230.8)                      |
| 164/+ | 96288 | 96503 | 71   | 8.24   | 4.26  | Salmonella phage STP4-a    | Prohead core (YP_009126365.1)                          | 200E-08 (48)  | -                                              |
| 165/+ | 96506 | 96925 | 139  | 16.19  | 11.14 | Proteus phage vB_PmiM      | Prohead core (AKA62019.1)                              | 300E-51 (70)  | -                                              |
| 166/+ | 96927 | 97556 | 209  | 23.13  | 5.16  | Proteus phage vB_PmiM      | Prohead core scaffold and Protease (AKA62020.1)        | 200E-111 (79) | Peptidase_S77 (PF03420.10)                     |



|       |        |        |     |       |       |                              |                                                                    |                  |                                                    |
|-------|--------|--------|-----|-------|-------|------------------------------|--------------------------------------------------------------------|------------------|----------------------------------------------------|
| 167/+ | 97589  | 98395  | 268 | 30.36 | 4.15  | Proteus phage vB_PmiM        | Prohead core scaffold (AKA62021.1)                                 | 300E-77<br>(56)  | -                                                  |
| 168/+ | 98410  | 99960  | 516 | 56.01 | 4.86  | Proteus phage vB_PmiM        | Major capsid (AKA62022.1)                                          | 0.0 (81)         | Gp23 (PF07068.8)                                   |
| 169/- | 100051 | 101298 | 415 | 46.16 | 4.47  | Proteus phage vB_PmiM        | Head vertex (AKA62023.1)                                           | 0.0 (78)         | Gp23 (PF07068.8)                                   |
| 170/- | 101364 | 101774 | 136 | 15.9  | 7.50  | Proteus phage vB_PmiM        | Hypothetical protein (AKA62024.1)                                  | 400E-42<br>(54)  | -                                                  |
| 171/- | 101905 | 102153 | 82  | 9.63  | 10.99 | Proteus phage vB_PmiM        | Hypothetical protein (WP_046099516.1)                              | 300E-07<br>(33)  | 1 TMD                                              |
| 172/- | 102155 | 102436 | 93  | 10.77 | 5.03  | -                            | -                                                                  | -                | -                                                  |
| 173/- | 102423 | 103418 | 331 | 38.14 | 5.38  | Proteus phage vB_PmiM        | RNA ligase 2 (AKA62027.1)                                          | 300E-131<br>(57) | RNA_ligase (PF09414.7)                             |
| 174/- | 103411 | 103770 | 119 | 14.17 | 5.16  | Proteus phage vB_PmiM        | Hypothetical protein (AKA62028.1)                                  | 800E-10<br>(34)  | -                                                  |
| 175/- | 103760 | 104020 | 86  | 10.24 | 5.15  | -                            | -                                                                  | -                | -                                                  |
| 176/- | 104017 | 104661 | 214 | 25.16 | 7.82  | Proteus phage vB_PmiM        | Hypothetical protein (AKA62028.1)                                  | 700E-07<br>(34)  | -                                                  |
| 177/- | 104698 | 104889 | 63  | 7.49  | 10.68 | Proteus phage vB_PmiM        | Hypothetical protein (AKA62030.1)                                  | 200E-19<br>(60)  | DUF2774 (PF11242.5)                                |
| 178/- | 104882 | 105331 | 149 | 16.85 | 8.94  | Desulfotomaculum kuznetsovii | Hypothetical protein (WP_013822025.1)                              | 200E-21<br>(34)  | -                                                  |
| 179/- | 105328 | 105783 | 151 | 17.44 | 4.15  | Proteus phage vB_PmiM        | Hypothetical protein (AKA62034.1)                                  | 100E-32<br>(46)  | -                                                  |
| 180/- | 105770 | 105976 | 68  | 7.89  | 4.23  | -                            | -                                                                  | -                | -                                                  |
| 181/- | 105973 | 106293 | 106 | 12.14 | 5.84  | -                            | -                                                                  | -                | -                                                  |
| 182/- | 106290 | 107048 | 252 | 29.99 | 4.41  | -                            | -                                                                  | -                | -                                                  |
| 183/- | 107059 | 107259 | 66  | 7.76  | 3.97  | -                            | -                                                                  | -                | -                                                  |
| 184/- | 107261 | 107599 | 112 | 13.48 | 5.67  | -                            | -                                                                  | -                | -                                                  |
| 185/- | 107754 | 108023 | 89  | 10.7  | 6.09  | -                            | -                                                                  | -                | -                                                  |
| 186/- | 108026 | 108214 | 62  | 7.36  | 4.70  | Proteus phage vB_PmiM        | Hypothetical protein (AKA62113.1)                                  | 800E-11<br>(53)  | -                                                  |
| 187/- | 108302 | 109216 | 304 | 33.42 | 4.63  | Proteus phage vB_PmiM        | Baseplate tail tube initiator (AKA62038.1)                         | 700E-174<br>(79) | Phage_T4_gp19 (PF06841.9)                          |
| 188/- | 109216 | 110262 | 348 | 38.28 | 6.81  | Proteus phage vB_PmiM        | Baseplate tail tube cap (AKA62039.1)                               | 0.0 (75)         | T4_tail_cap (PF11091.5)                            |
| 189/- | 110262 | 111962 | 566 | 62.73 | 4.61  | Proteus phage vB_PmiM        | Baseplate hub subunit and tail length<br>determinator (AKA62040.1) | 300E-119<br>(41) | 1 TMD                                              |
| 190/- | 111946 | 112425 | 159 | 18.18 | 5.68  | Proteus phage vB_PmiM        | Baseplate hub distal subunit (AKA62041.1)                          | 300E-62<br>(59)  | Phage_hub_GP28 (PF11110.5)                         |
| 191/- | 112406 | 113572 | 388 | 44.55 | 4.84  | Proteus phage vB_PmiM        | Baseplate hub subunit (AKA62042.1)                                 | 0.0 (68)         | Phage-tail_1 (PF09097.7); Phage-tail_2 (PF09096.7) |
| 192/+ | 113572 | 114333 | 253 | 29.97 | 5.14  | Proteus phage vB_PmiM        | Baseplate hub assembly (AKA62043.1)                                | 100E-84<br>(53)  | 1 TMD; T4_baseplate (PF12322.5)                    |
| 193/+ | 114380 | 114979 | 199 | 23.04 | 4.47  | Proteus phage vB_PmiM        | Baseplate hub subunit (AKA62044.1)                                 | 100E-40<br>(41)  | T4_baseplate (PF12322.5)                           |
| 194/+ | 114972 | 115358 | 128 | 14.38 | 4.71  | Proteus phage vB_PmiM        | Baseplate wedge subunit (AKA62045.1)                               | 900E-56<br>(66)  | Gene 25-like lysozyme (pfam04965)                  |
| 195/+ | 115565 | 115975 | 136 | 15.74 | 8.63  | Proteus phage vB_PmiM        | recombination repair and ssDNA binding<br>protein (AKA62046.1)     | 300E-65<br>(71)  | UvsY (PF11056.5)                                   |

|       |        |        |     |       |      |                                  |                                                                            |               |                                              |
|-------|--------|--------|-----|-------|------|----------------------------------|----------------------------------------------------------------------------|---------------|----------------------------------------------|
| 196/+ | 115975 | 116187 | 70  | 8.25  | 4.73 | -                                | -                                                                          | -             | -                                            |
| 197/- | 116188 | 116349 | 53  | 6.12  | 4.01 | Proteus phage vB_PmiM            | Hypothetical protein (AKA62047.1)                                          | 100E-06 (48)  | DUF2685 (PF10886.5)                          |
| 198/- | 116341 | 116568 | 75  | 8.66  | 4.06 | Edwardsiella phage PEi20         | RNA-DNA and DNA-DNA helicase ATPase (BAQ22851.1)                           | 300E-17 (56)  | UvsW (PF11637.5)                             |
| 199/+ | 116579 | 118072 | 497 | 57.62 | 9.43 | Enterobacteria phage vB_EcoM_VR5 | Helicase (AIZ01970.1)                                                      | 0.0 (69)      | ResIII (PF04851.12); Helicase_C (PF00271.28) |
| 200/+ | 118131 | 118853 | 240 | 27.48 | 4.28 | Proteus phage vB_PmiM            | Inhibitor of prohead protéase (AKA62050.1)                                 | 500E-83 (55)  | -                                            |
| 201/- | 118865 | 119950 | 361 | 39.71 | 4.51 | Proteus phage vB_PmiM            | Head outer capsid (AKA62051.1)                                             | 100E-176 (68) | -                                            |
| 202/- | 119984 | 120595 | 203 | 23.64 | 4.84 | -                                | -                                                                          | -             | -                                            |
| 203/- | 120595 | 120939 | 114 | 13    | 4.03 | -                                | -                                                                          | -             | -                                            |
| 204/- | 120941 | 121228 | 95  | 10.84 | 4.44 | -                                | -                                                                          | -             | -                                            |
| 205/- | 121291 | 123345 | 684 | 77.21 | 5.27 | Proteus phage vB_PmiM            | RNA polymerase ADP-ribosylase (AKA62054.1)                                 | 0.0 (49)      | ADPrib_exo_Tox (PF03496.11)                  |
| 206/- | 123405 | 124874 | 489 | 55.74 | 4.78 | Proteus phage vB_PmiM            | DNA ligase (AKA62057.1)                                                    | 0.0 861)      | DNA_ligase_A_M (PF01068.18)                  |
| 207/- | 124875 | 125513 | 212 | 24.41 | 5.89 | Proteus phage vB_PmiM            | Hypothetical protein (AKA62058.1)                                          | 300E-126 (84) | -                                            |
| 208/- | 125510 | 125965 | 151 | 17.27 | 9.67 | Proteus phage vB_PmiM            | Hypothetical protein (AKA62061.1)                                          | 500E-47 (55)  | Phage_30_3 (PF08010.8)                       |
| 209/- | 125966 | 126418 | 150 | 17.46 | 5.10 | -                                | -                                                                          | -             | -                                            |
| 210/- | 126415 | 126813 | 132 | 15.53 | 4.44 | -                                | -                                                                          | -             | -                                            |
| 211/- | 126824 | 127246 | 140 | 15.97 | 4.19 | -                                | -                                                                          | -             | -                                            |
| 212/- | 127246 | 127509 | 87  | 10.14 | 4.65 | -                                | -                                                                          | -             | -                                            |
| 213/- | 127559 | 127915 | 118 | 13.58 | 7.05 | Citrobacter phage Merlin         | Hypothetical protein (AKU43875.1)                                          | 100E-25 (46)  | Phage_T4_Gp30_7 (PF06919.8)                  |
| 214/- | 127986 | 128351 | 121 | 14.22 | 4.67 | Streptomyces ahngroscopicus      | Hypothetical protein (WP_044370027.1)                                      | 600E-38 (57)  | Phage_30_8 (PF06019.8)                       |
| 215/- | 128452 | 128688 | 78  | 9.25  | 4.78 | Proteus phage vB_PmiM            | Hypothetical protein (AKA62063.1)                                          | 300E-37 (79)  | -                                            |
| 216/- | 128804 | 129049 | 81  | 9.32  | 9.93 | Proteus phage vB_PmiM            | rIII lysis inhibition accessory protein rapid lysis phenotype (AKA62065.1) | 200E-40 (81)  | -                                            |
| 217/- | 129108 | 129428 | 106 | 11.49 | 6.53 | Proteus phage vB_PmiM            | Head assembly cochaperone with GroEL (AKA62066.1)                          | 500E-42 (67)  | Cpn10 (PF00166.18)                           |
| 218/- | 129428 | 129733 | 101 | 11.55 | 5.76 | Klebsiella phage JD18            | Hypothetical protein (AKY02076.1)                                          | 200E-17 (43)  | DUF2693 (PF10902.5)                          |
| 219/- | 129730 | 130281 | 183 | 20.2  | 6.77 | Enterobacteria phage vB_EcoM_VR5 | Deoxycytidylate deaminase (AIZ02003.1)                                     | 900E-83 (66)  | dCMP_cyt_deam_1 (PF00383.20)                 |
| 220/- | 130281 | 130568 | 95  | 10.95 | 4.36 | Acinetobacter phage 133          | Hypothetical protein (YP_004300794.1)                                      | 200E-04 (42)  | -                                            |
| 221/- | 130568 | 130843 | 91  | 10.39 | 4.14 | -                                | -                                                                          | -             | -                                            |
| 222/- | 130843 | 131052 | 69  | 7.51  | 4.46 | -                                | -                                                                          | -             | -                                            |
| 223/- | 131049 | 131246 | 65  | 7.39  | 5.75 | -                                | -                                                                          | -             | -                                            |
| 224/- | 131249 | 131494 | 81  | 9.41  | 3.86 | -                                | -                                                                          | -             | -                                            |

|       |        |        |      |        |       |                                   |                                                                |               |                                                                                   |
|-------|--------|--------|------|--------|-------|-----------------------------------|----------------------------------------------------------------|---------------|-----------------------------------------------------------------------------------|
| 225/- | 131521 | 132237 | 238  | 26.96  | 10.19 | Acinetobacter phage 133           | Seg-like homing endonuclease (YP_004300718.1)                  | 900E-28 (59)  | -                                                                                 |
| 226/- | 132294 | 133190 | 298  | 34.97  | 7.98  | Proteus phage vB_PmiM             | 3'-phosphatase 5'-polynucleotide kinase (AKA62075.1)           | 200E-124 (60) | AAA_33 (PF13671.3)                                                                |
| 227/- | 133187 | 133681 | 164  | 18.75  | 4.89  | Proteus phage vB_PmiM             | Hypothetical protein (AKA62077.1)                              | 100E-18 (35)  | -                                                                                 |
| 228/- | 133748 | 134032 | 94   | 11.02  | 8.46  | Enterobacteria phage RB3          | Outer membrane lipoprotein (YP_009098605.1)                    | 100E-27 (49)  | 1 SP                                                                              |
| 229/- | 134029 | 134379 | 116  | 13.3   | 9.97  | Edwardsiella phage PEi26          | Hypothetical protein (BAQ23193.1)                              | 100E-06 (35)  | 1 TMD; 1 SP                                                                       |
| 230/- | 134367 | 134867 | 166  | 19.35  | 8.57  | Proteus phage vB_PmiM             | Inhibitor of host transcription (AKA62080.1)                   | 100E-54 (55)  | -                                                                                 |
| 231/- | 134927 | 136021 | 364  | 42.48  | 4.81  | Proteus phage vB_PmiM             | RNA ligase 1 and tail fiber attachment catalyst (AKA62081.1)   | 500E-147 (58) | RNA_lig_T4_1 (PF09511.7)                                                          |
| 232/- | 136008 | 136139 | 43   | 5.11   | 9.32  | Enterobacteria phage CC31         | endonuclease II (YP_004010090.1)                               | 700E-10 (90)  | -                                                                                 |
| 233/- | 136485 | 137672 | 395  | 45.94  | 4.61  | Proteus phage vB_PmiM             | Aerobic NDP reductase small subunit (AKA62083.1)               | 0.0 (66)      | Ribonuc_red_sm (PF00268.18)                                                       |
| 234/- | 137659 | 138405 | 248  | 28.51  | 10.25 | Enterobacteria phage RB3          | Homing endonuclease (YP_009098612.1)                           | 100E-114 (67) | NUMOD3 (PF07460.8); NUMOD1 (PF07453.10)                                           |
| 235/- | 138406 | 140640 | 744  | 84.8   | 5.73  | Proteus phage vB_PmiM             | Aerobic NDP reductase large subunit (AKA62085.1)               | 0.0 (72)      | ATP-cone (PF03477.13); Ribonuc_red_lgN (PF00317.18); Ribonuc_red_lgC (PF02867.12) |
| 236/- | 140642 | 140875 | 77   | 9.21   | 8.06  | Enterobacteria phage vB_EcoM_VR20 | Hypothetical protein (AIZ02300.1)                              | 400E-30 (76)  | DUF4326 (PF14216.3)                                                               |
| 237/- | 141002 | 141268 | 88   | 10.5   | 5.15  | -                                 | -                                                              | -             | -                                                                                 |
| 238/- | 141277 | 141555 | 92   | 10.64  | 5.90  | -                                 | -                                                              | -             | -                                                                                 |
| 239/- | 141647 | 141952 | 101  | 11.47  | 3.72  | -                                 | -                                                              | -             | -                                                                                 |
| 240/- | 142020 | 142859 | 279  | 32.28  | 6.31  | Proteus phage vB_PmiM             | Thymidylate synthase (AKA62089.1)                              | 100E-148 (72) | Thymidylat_synt (PF00303.16)                                                      |
| 241/- | 142860 | 143417 | 185  | 20.66  | 4.65  | Acinetobacter phage Acj61         | Hypothetical protein (YP_004009740.1)                          | 800E-28 (38)  | -                                                                                 |
| 242/- | 143404 | 143649 | 81   | 9.24   | 4.48  | Enterobacteria phage phi92        | Hypothetical protein (YP_009012530.1)                          | 200E-24 (56)  | -                                                                                 |
| 243/- | 143652 | 143864 | 70   | 7.74   | 4.20  | -                                 | -                                                              | -             | -                                                                                 |
| 244/- | 143875 | 144297 | 140  | 16.42  | 9.29  | Proteus phage vB_PmiM             | Hypothetical protein (AKA62091.1)                              | 300E-11 (31)  | -                                                                                 |
| 245/- | 144284 | 144883 | 199  | 22.43  | 4.63  | Proteus phage vB_PmiM             | Dihydrofolate reductase (WP_044369981.1)                       | 600E-21 (36)  | DHFR_1 (PF00186.16)                                                               |
| 246/- | 144973 | 145860 | 295  | 32.67  | 4.47  | Proteus phage vB_PmiM             | ssDNA-binding protein (AKA62094.1)                             | 900E-148 (71) | gp32 (PF08804.7)                                                                  |
| 247/- | 145896 | 146546 | 216  | 25.7   | 9.63  | Proteus phage vB_PmiM             | DNA helicase loading protein (AKA62095.1)                      | 400E-116 (77) | T4_Gp59_N (PF08993.7); T4_Gp59_C (PF08994.7)                                      |
| 248/- | 146543 | 146815 | 90   | 10.42  | 4.36  | Streptomyces ahygroscopicus       | late promoter transcription accessory protein (WP_016031138.1) | 700E-27 (55)  | Trans_coact (PF16805.2)                                                           |
| 249/- | 146790 | 147059 | 89   | 10.36  | 4.63  | Proteus phage vB_PmiM             | dsDNA binding protein (AKA62097.1)                             | 800E-41 (75)  | Phage_DsbA (PF11126.5)                                                            |
| 250/+ | 147071 | 147988 | 305  | 35.75  | 6.54  | Proteus phage vB_PmiM             | RNase H (AKA62098.1)                                           | 200E-139 (65) | 5_3_exonuc_N (PF02739.13); RNaseH_C (PF09293.7)                                   |
| 251/+ | 148037 | 151687 | 1216 | 134.62 | 4.92  | Proteus phage vB_PmiM             | Long tail fiber proximal subunit (AKA62099.1)                  | 0.0 (60)      | -                                                                                 |

|       |        |        |     |       |       |                                   |                                                               |               |                                   |
|-------|--------|--------|-----|-------|-------|-----------------------------------|---------------------------------------------------------------|---------------|-----------------------------------|
| 252/+ | 151689 | 152825 | 378 | 43.15 | 4.64  | Proteus phage vB_PmiM             | Long tail fiber proximal connector (AKA62100.1)               | 300E-102 (44) | -                                 |
| 253/+ | 153014 | 153496 | 160 | 17.3  | 4.19  | Proteus phage vB_PmiM             | Long tail fiber distal connector (AKA62101.1)                 | 200E-24 (40)  | Phage_T4_gp36 (PF03903.10)        |
| 254/+ | 153496 | 155202 | 568 | 61.7  | 8.66  | Proteus phage vB_PmiM             | Long tail fiber distal subunit (AKA62102.1)                   | 200E-22 (46)  | -                                 |
| 255/- | 155211 | 155834 | 207 | 24.06 | 6.12  | Proteus phage vB_PmiM             | Holin lysis mediator (AKA62104.1)                             | 100E-90 (64)  | Phage_holin_T (pfam11031) ; 1 TMD |
| 256/- | 155835 | 156026 | 63  | 7.59  | 10.52 | Yersinia phage phiR1-RT           | Hypothetical protein (YP_007235932.1)                         | 100E-19 (67)  | -                                 |
| 257/- | 155998 | 156474 | 158 | 18.56 | 6.12  | Proteus phage vB_PmiM             | Hypothetical protein (AKA62105.1)                             | 200E-08 (27)  | -                                 |
| 258/- | 156462 | 156773 | 103 | 12    | 4.54  | Proteus phage vB_PmiM             | Hypothetical protein (AKA62106.1)                             | 400E-11 (42)  | -                                 |
| 259/- | 156773 | 157141 | 122 | 14.03 | 4.07  | Proteus phage vB_PmiM             | Hypothetical protein (AKA62107.1)                             | 500E-11 (37)  | -                                 |
| 260/- | 157148 | 157450 | 100 | 11.52 | 8.02  | Enterobacteria phage vB_KleM-RaK2 | Hypothetical protein (YP_007007436.1)                         | 100E-04 (56)  | -                                 |
| 261/- | 157463 | 157657 | 64  | 7.75  | 4.36  | -                                 | -                                                             | -             | -                                 |
| 262/- | 157665 | 157943 | 92  | 10.69 | 5.63  | -                                 | -                                                             | -             | -                                 |
| 263/- | 157943 | 158116 | 57  | 6.71  | 10.38 | -                                 | -                                                             | -             | -                                 |
| 264/- | 158118 | 158378 | 86  | 10.07 | 4.63  | Proteus phage vB_PmiM             | Anti-sigma 70 protein (AKA62109.1)                            | 400E-21 (50)  | AsiA (PF09010.7)                  |
| 265/- | 158375 | 158950 | 191 | 21.17 | 4.81  | Proteus phage vB_PmiM             | Activator of middle transcription (AKA62111.1)                | 500E-37 (37)  | MotCF (PF09158.7)                 |
| 266/- | 159046 | 160407 | 453 | 51.72 | 7.36  | Proteus phage vB_PmiM             | DNA topoisomerase (AKA62115.1)                                | 0.0 (63)      | DNA_topoisoIV (PF00521.17)        |
| 267/- | 160445 | 160897 | 150 | 17.41 | 9.78  | Proteus phage vB_PmiM             | Nucleoid disruption protein (AKA62116.1)                      | 900E-25 (44)  | Phage_T4_Ndd (PF06591.8)          |
| 268/- | 160897 | 161445 | 182 | 21.09 | 6.68  | Acinetobacter phage 133           | DenB DNA endonuclease IV (YP_004300837.1)                     | 100E-31 (40)  | -                                 |
| 269/- | 161492 | 161986 | 164 | 19.08 | 10.20 | Enterobacteria phage vB_EcoM-VR7  | Hypothetical protein (YP_004063973.1)                         | 900E-80 (69)  | AP2 (PF00847.17)                  |
| 270/- | 161986 | 163197 | 403 | 45.68 | 4.64  | Edwardsiella phage PEi26          | rIIB protector from prophage-induced early lysis (BAQ23251.1) | 500E-107 (63) | -                                 |

TMD – transmembrane domain; SP – Signal peptide

**Table S3. Features of MP2 predicted CDSs.** For each CDS the transcription start and stop position, and the coding strand is given. At protein level the corresponding gene product size molecular weight and pI as well as the homolog predicted function homology, values and motifs are shown.

| ORF (+/-) | Start (bp) | Stop (bp) | Predicted protein |          |       | Best species hit      | Putative function (accession no.)            | E-value (% identify) | Motifs                                                                |
|-----------|------------|-----------|-------------------|----------|-------|-----------------------|----------------------------------------------|----------------------|-----------------------------------------------------------------------|
|           |            |           | Size (aa)         | MW (Kda) | pI    |                       |                                              |                      |                                                                       |
| 1/+       | 611        | 769       | 52                | 5.89     | 10.00 | Citrobacter phage CR8 | Hypothetical protein (YP_009004161.1)        | 1e-08 (56)           | -                                                                     |
| 2/+       | 858        | 1,106     | 82                | 9.48     | 4.42  | -                     | -                                            | -                    | -                                                                     |
| 3/+       | 1,194      | 1,574     | 126               | 14.65    | 3.52  | Morganella phage MmP1 | Hypothetical protein (YP_002048671.1)        | 5e-32 (64)           | ocr (PF08684.7)                                                       |
| 4/+       | 1,567      | 1,770     | 67                | 7.68     | 4.14  | -                     | -                                            | -                    | -                                                                     |
| 5/+       | 1,831      | 2,022     | 63                | 7.20     | 4.07  | -                     | -                                            | -                    | 4 TMD                                                                 |
| 6/+       | 2,038      | 2,334     | 98                | 11.55    | 10.46 | -                     | -                                            | -                    | -                                                                     |
| 7/+       | 2,336      | 2,611     | 91                | 10.71    | 5.58  | -                     | -                                            | -                    | -                                                                     |
| 8/+       | 2,604      | 3,119     | 171               | 19.10    | 6.11  | -                     | -                                            | -                    | -                                                                     |
| 9/+       | 3,246      | 3,464     | 72                | 8.28     | 4.05  | -                     | -                                            | -                    | -                                                                     |
| 10/+      | 3,554      | 6,205     | 883               | 100.17   | 7.24  | Morganella phage MmP1 | RNA Polymerase (YP_003324580.1)              | 0 (92)               | RPOL_N (PF14700.3); RNA_pol (PF00940.169)                             |
| 11/+      | 6,538      | 6,699     | 53                | 6.43     | 11.04 | Morganella phage MmP1 | Hypothetical protein (YP_002048631.1)        | 2e-09 (96)           | -                                                                     |
| 12/+      | 6,704      | 6,943     | 79                | 9.68     | 8.48  | -                     | -                                            | -                    | -                                                                     |
| 13/+      | 6,948      | 7,979     | 343               | 38.84    | 4.99  | Morganella phage MmP1 | DNA Ligase (YP_002048633.1)                  | 0 (98)               | DNA_ligase_A_M (PF01068.18)                                           |
| 13A/+     | 7,981      | 8,154     | 57                | 6.34     | 9.38  | -                     | -                                            | -                    | 2 TMD, 1 SP                                                           |
| 13B/+     | 8,181      | 8,360     | 59                | 6.70     | 7.91  | -                     | -                                            | -                    | 2 TMD                                                                 |
| 13C/+     | 8,435      | 8,542     | 35                | 4.01     | 6.50  | -                     | -                                            | -                    | 1 TMD                                                                 |
| 14/+      | 8,599      | 8,874     | 91                | 10.63    | 11.87 | Morganella phage MmP1 | Hypothetical protein (YP_002048636.1)        | 7e-44 (77)           | -                                                                     |
| 15/+      | 8,876      | 9,460     | 194               | 21.72    | 8.04  | Morganella phage MmP1 | Hypothetical protein (YP_002048637.1)        | 3e-48 (53)           | DUF3310 (PF11753.5)                                                   |
| 16/+      | 9,438      | 9,608     | 56                | 6.79     | 4.44  | Morganella phage MmP1 | Hypothetical protein (YP_002048638.1)        | 1e-13 (70)           | -                                                                     |
| 17/+      | 9,595      | 9,804     | 69                | 7.49     | 4.27  | Morganella phage MmP1 | RNA polymerase inhibitor (YP_002048639.1)    | 7e-32 (77)           | RNA_pol_inhib (PF16857.2)                                             |
| 18/+      | 9,855      | 10,574    | 239               | 26.47    | 4.24  | Morganella phage MmP1 | single-stranded DNA-binding (YP_002048640.1) | 2e-89 (87)           | -                                                                     |
| 19/+      | 10,574     | 11,017    | 147               | 17.23    | 9.98  | Morganella phage MmP1 | Endonuclease I (YP_002048641.1)              | 5e-94 (93)           | Phage_endo_I (PF05367.8)                                              |
| 20/+      | 11,039     | 11,263    | 74                | 8.31     | 8.75  | -                     | -                                            | -                    | -                                                                     |
| 21/+      | 11,260     | 11,721    | 153               | 17.37    | 9.63  | Morganella phage MmP1 | Endolysin (YP_002048642.1)                   | 8e-102 (93)          | Amidase_2 (PF01510)                                                   |
| 22/+      | 11,798     | 12,034    | 78                | 8.54     | 4.14  | Morganella phage MmP1 | Hypothetical protein (YP_002048643.1)        | 8e-10 (54)           | -                                                                     |
| 23/+      | 12,064     | 13,803    | 579               | 64.08    | 4.96  | Morganella phage MmP1 | DNA Primase/Helicase (YP_002048644.1)        | 0 (86)               | Prim_Zn_Ribbon (PF08273.9); Toprim_2 (PF13155.3); DnaB_C (PF03796.12) |
| 24/+      | 13,763     | 13,885    | 40                | 4.76     | 8.49  | -                     | -                                            | -                    | -                                                                     |
| 25/+      | 13,898     | 14,110    | 70                | 7.83     | 10.62 | Morganella phage MmP1 | Hypothetical protein (YP_002048645.1)        | 3e-24 (93)           | -                                                                     |
| 25A/+     | 14,120     | 14,299    | 59                | 6.98     | 9.57  | -                     | -                                            | -                    | -                                                                     |

|       |        |        |      |        |       |                              |                                               |             |                                  |
|-------|--------|--------|------|--------|-------|------------------------------|-----------------------------------------------|-------------|----------------------------------|
| 26/+  | 14,296 | 14,526 | 76   | 9.24   | 8.98  | Morganella phage MmP1        | hypothetical protein (YP_002048646.1)         | 6e-25 (76)  | -                                |
| 27/+  | 14,604 | 16,712 | 702  | 79.76  | 6.85  | Morganella phage MmP1        | DNA polymerase (YP_002048647.1)               | 0 (89)      | DNA_pol_A (PF00476.17)           |
| 28/+  | 16,737 | 17,063 | 108  | 12.76  | 6.62  | Morganella phage MmP1        | Hypothetical protein (YP_002048648.1)         | 6e-17 (54)  | -                                |
| 29/+  | 17,068 | 17,355 | 95   | 10.52  | 5.12  | -                            | -                                             | -           | -                                |
| 30/+  | 17,376 | 17,585 | 69   | 7.56   | 8.48  | Morganella phage MmP1        | Hypothetical protein (YP_002048650.1)         | 3e-40 (93)  | -                                |
| 31/+  | 17,591 | 17,803 | 70   | 8.05   | 5.06  | Morganella phage MmP1        | Hypothetical protein (YP_002048651.1)         | 6e-38 (86)  | -                                |
| 32/+  | 17,794 | 18,711 | 305  | 35.06  | 5.05  | Morganella phage MmP1        | Exonuclease (YP_002048652.1)                  | 0 (90)      | 5_3_exonuc_N (PF02739.13)        |
| 33/+  | 18,854 | 19,102 | 82   | 9.36   | 5.10  | Morganella phage MmP1        | Hypothetical protein (ACF42032.2)             | 3e-17 (74)  | DUF2717 (PF10911.5)              |
| 34/+  | 19,121 | 19,357 | 78   | 8.44   | 10.54 | Morganella phage MmP1        | Hypothetical protein (YP_002048654.1)         | 3e-23 (70)  | -                                |
| 35/+  | 19,381 | 19,614 | 77   | 7.93   | 10.11 | Escherichia phage CICC 80001 | Host Range Protein (YP_009152490.1)           | 2e-04 (46)  | VirionAssem_T7 (PF11653.5)       |
| 36/+  | 19,631 | 21,262 | 543  | 59.35  | 4.35  | Morganella phage MmP1        | Head-to-tail joining protein (YP_002048655.1) | 0 (92)      | Head-tail_con (PF12236.5)        |
| 37/+  | 21,386 | 22,354 | 322  | 35.43  | 4.11  | Morganella phage MmP1        | Capsid assembly protein (YP_002048656.1)      | 0 (80)      | Phage_T7_Capsid (PF05396.8)      |
| 38/+  | 22,485 | 23,516 | 343  | 36.23  | 6.18  | Morganella phage MmP1        | Major capsid protein (YP_002048657.1)         | 0 (89)      | -                                |
| 39/+  | 23,516 | 23,647 | 43   | 4.69   | 6.76  | Morganella phage MmP1        | Hypothetical protein (YP_002048658.1)         | 7e-05 (80)  | -                                |
| 40/+  | 23,718 | 24,311 | 197  | 22.09  | 4.22  | Morganella phage MmP1        | Tail tubular protein A (YP_002048659.1)       | 6e-99 (86)  | -                                |
| 41/+  | 24,331 | 26,790 | 819  | 90.77  | 5.74  | Morganella phage MmP1        | Tail tubular protein B (YP_002048660.1)       | 0 (88)      | -                                |
| 42/+  | 26,867 | 27,280 | 137  | 15.72  | 5.18  | Morganella phage MmP1        | Internal virion protein A (YP_002048661.1)    | 5e-84 (87)  | DUF2833 (PF11090.5)              |
| 43/+  | 27,280 | 27,858 | 192  | 20.41  | 10.07 | Morganella phage MmP1        | Internal virion protein B (YP_002048662.1)    | 1e-87 (84)  | -                                |
| 44/+  | 27,858 | 30,062 | 734  | 82.57  | 4.67  | Morganella phage MmP1        | Internal virion protein C (YP_002048663.1)    | 0 (76)      | -                                |
| 45/+  | 30,081 | 34,010 | 1309 | 143.87 | 6.91  | Morganella phage MmP1        | Internal virion protein D (YP_002048664.1)    | 0 (70)      | STL (PF01464); 2 TMD             |
| 46/+  | 34,101 | 35,819 | 572  | 63.26  | 8.41  | Morganella phage MmP1        | Tail fiber protein (YP_002048665.1)           | 0 (72)      | Phage_holin_2_2 (PF10746); 1 TMD |
| 47/+  | 35,867 | 36,091 | 74   | 7.94   | 6.67  | Morganella phage MmP1        | Holin (YP_002048666.1)                        | 8e-44 (100) | Phage_lysis (PF03245)            |
| 48/+  | 36,075 | 36,347 | 90   | 10.22  | 4.84  | Morganella phage MmP1        | DNA packaging small subunit (YP_002048667.1)  | 2e-48 (87)  | DNA_Packaging_2 (PF11123.5)      |
| 49/+  | 36,452 | 36,898 | 148  | 16.57  | 9.29  | Morganella phage MmP1        | Rz-like lysis protein (YP_002048669.1)        | 2e-99 (99)  | Phage_lysis (PF03245.10)         |
| 50/+  | 36,912 | 38,672 | 586  | 66.55  | 6.09  | Morganella phage MmP1        | DNA packaging protein B (YP_002048670.1)      | 0 (92)      | 1 TMD                            |
| 50A/+ | 38,946 | 39,056 | 36   | 4.05   | 10.45 | -                            | -                                             | -           | -                                |

TMD – transmembrane domain; SP – Signal peptide

**Figure S1. Cytotoxicity assay of MP1 and MP2 on mammalian cells.** The cytotoxic effect was evaluated by incubating SM buffer (as a negative control), MP1 or MP2 with a end concentration of  $10^8$  PFUs/mL, with a cell line A549 (ATCC CCL-185) for 24 h. The amount of soluble formazan produced by cellular reduction of MTS was measured by reading the absorbance at 490 nm, after addition of the CellTiter 96 Aqueous One Solution Reagent. The experiment was performed in triplicate.

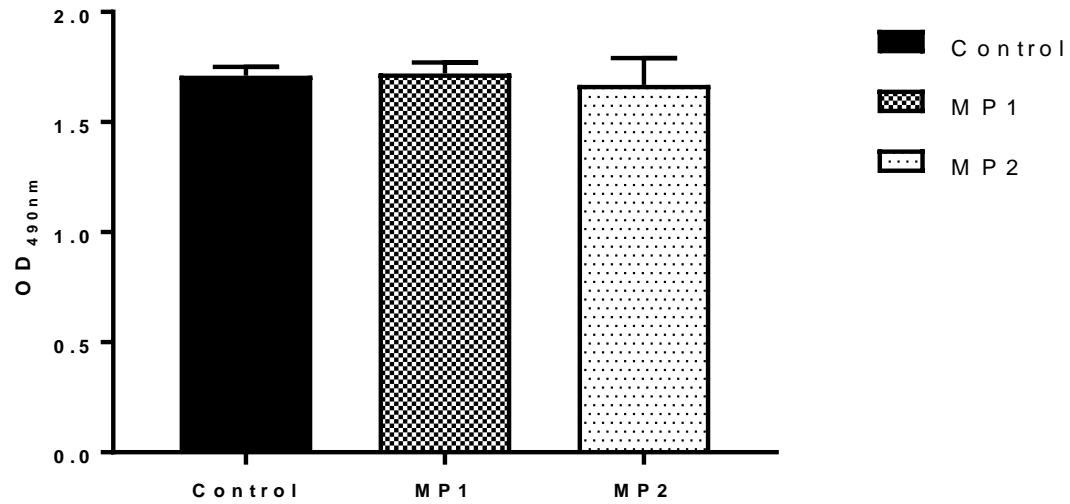

**Figure S2. Nucleotide dot plot analysis of *Morganella* phage genomes.** Nucleic acid comparisons of A) MP1 or B) MP2 genomes were compared to *Tevenvirinae* and *Autographivirinae* like phages, respectively. Fasta files of whole genome sequences were downloaded from GenBank and relationships were assigned using Gepard, which are indicated by the diagonal lines.

**A)**

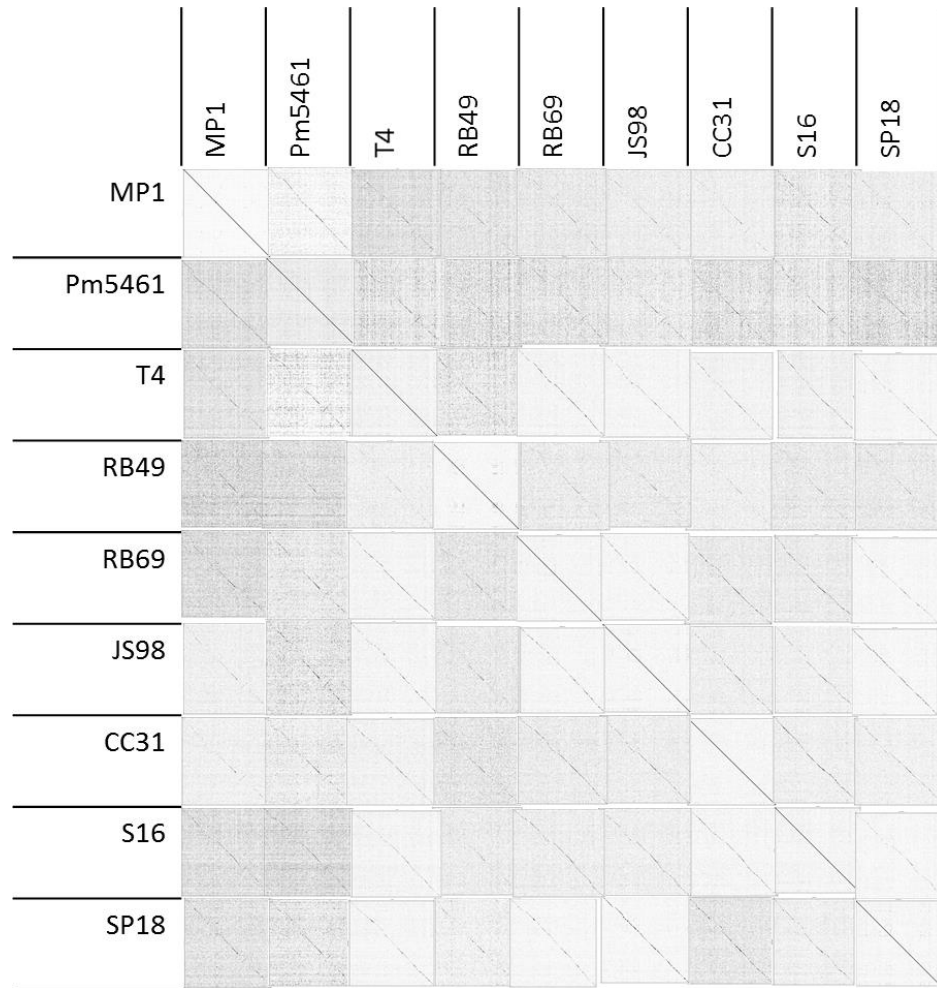

**B)**

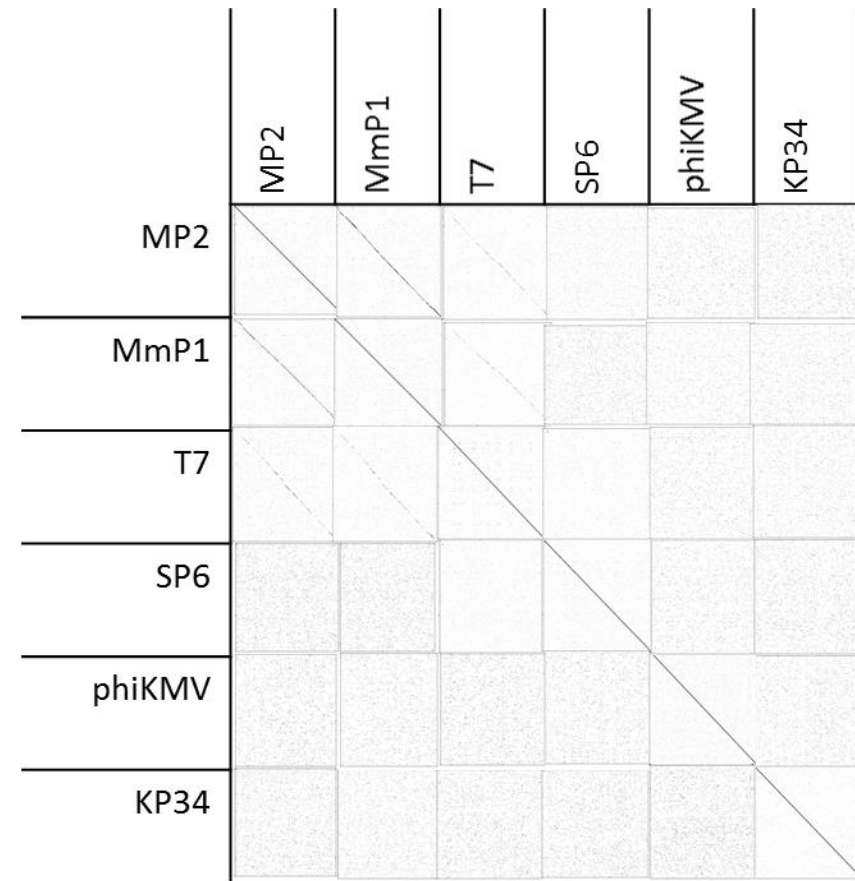

Supplement: srep46157-s1.pdf [file srep46157-s1.pdf]
